# Supplementary material
Source: HighWire-hosted journal article supplement (http://ajnr-stage2.highwire.org/highwire/filestream/89527/field_highwire_adjunct_files/0/0314.pdf)
Supplement: 0314.pdf [file 0314.pdf]

**Supplementary Files for *Machine Learning Based Prediction of Small Intracranial Aneurysm Rupture Status Using Computed Tomography Angiography Derived Hemodynamics: A Multicenter Study.***

**Appendices**

**Supplemental Appendix 1.** Introduction of the Hemodynamic Parameters by CFD.

**Supplemental Appendix 2.** Introduction of the Employed Machine Learning Algorithms.

**Supplemental Appendix 3.** Introduction of the Employed Feature Selection Algorithms.

**Supplemental Appendix 4.** The Feature Selection Results.

**Figures**

**Supplemental Figure 1.** Computational Fluid Dynamics (CFDs) Simulation Procedure.

The graph indicates the major procedures of CFD, including human annotation, model reconstruction, unstructured meshes, and transient CFD simulation.

**Supplemental Figure 2.** Representative Qualitative Hemodynamic Parameters for Unruptured and Ruptured sIAs.

**Supplemental Figure 3.** Calibration Curves in the Internal Dataset.

**Supplemental Figure 4.** Performance of LR Algorithm, the derived top 10 variables and the performance of the features belonging to the three categories separately in the internal validation dataset.

**Supplemental Figure 5.** Performance of RF Algorithm, the derived top 10 variables and the performance of the features belonging to the three categories separately in the internal validation dataset.

**Supplemental Figure 6.** Performance of MLP Algorithm and the Performance of the Features Belonging to the Three Categories Separately in the Internal Validation Dataset.

**Tables**

**Supplemental Table 1.** CTA Protocols of the Three Medical Centers.

**Supplemental Table 2.** Characteristics of Clinical, Morphological and Hemodynamics in Unruptured and Ruptured Small Aneurysms in the Internal Dataset.

**Supplemental Table 3.** Characteristics of Patients, Aneurysms and Hemodynamics in the Training, Internal Validation and External Validation Dataset.

**Supplemental Table 4.** Characteristics of Clinical, Morphological and Hemodynamic in Internal Dataset and the Separating External Validation Dataset.

**Supplemental Table 5.** Performance of 3 ML Models to Predict Rupture Status of small Aneurysms in the Training, Internal Validation and External Validation Datasets.

## **Supplemental Appendix 1.** Introduction of the Hemodynamic Parameters by CFD.

Eleven quantitative hemodynamic parameters were included in this study to describe and analyze the sophisticated blood flow conditions. The parameters were pressure, wall shear stress (WSS), averaged WSS-absolute (AWSS-ABS), averaged WSS-mean (AWSS-MEAN), WSS gradient (WSSG), averaged WSS gradient (AWSSG), oscillatory shear index (OSI), relative residence time (RRT), aneurysm formation index (AFI), gradient oscillatory number (GON) and spatial WSS gradient (G). All parameter values were acquired from cardiac systolic telophase.<sup>1,2</sup> The amount of each quantitative hemodynamic factor depends on the amount of image-based aneurysm grid, therefore we used the coefficient of variation (CV) which could describe the dispersion degree of data to describe the hemodynamic parameters of intracranial aneurysms sac. In the following, the quantitative hemodynamic parameters were expressed as Pressure<sub>CV</sub>, AWSSMEAN<sub>CV</sub>, WSS<sub>CV</sub>, AWSSABS<sub>CV</sub>, OSI<sub>CV</sub>, RRT<sub>CV</sub>, WSSG<sub>CV</sub>, AWSSG<sub>CV</sub>, AFI<sub>CV</sub>, G<sub>CV</sub>, and GON<sub>CV</sub>.

### ***Quantitative hemodynamic parameters***

1. Pressure.
2. Wall shear stress (**WSS**): WSS is the tangential force exerted by the viscosity of the movement of the blood wall. It is measured in  $\text{N/m}^2$ , namely in Pa.
3. Averaged WSS- absolute (**AWSS-ABS**): time-average of the absolute value of WSS during a cardiac cycle.
4. Averaged WSS -mean (**AWSS-MEAN**): time-average of the mean WSS during a cardiac cycle.
5. WSSgradient (**WSSG**): a spatial derivative measure along the direction of the flow.
6. Averaged WSSgradient (**AWSSG**): the time-average spatial WSS gradient during a cardiac cycle.
7. Oscillatory shear index (**OSI**): a non-dimensional parameter, means the directional change of WSS during the cardiac cycle.
8. Relative residence time (**RRT**): a marker of disturbed flow, which marked by low magnitude and high oscillatory wall shear stress.
9. Aneurysm formation index (**AFI**): quantifies the cosine of the angle between two vectors, which represent a certain instant during the flow cycle and the time-averaged WSS vector.
10. Gradient oscillatory number (**GON**): quantifies the degree of oscillating tension/compression forces.

## 11. G: spatial WSS gradient.

### *Qualitative hemodynamic parameters*

Four qualitative hemodynamic parameters were included in this study. The parameters were consisted of flow complexity, flow stability, inflow concentration, flow impingement introduced by Cerebral et al.<sup>3</sup> The computed blood flow fields were visualized by using streamlines in the sac.

The hemodynamic visualizations were analyzed to classify blood flows according to the following characteristics:

**Flow complexity.** “Simple” flow pattern indicates flow patterns consisting of a single recirculation zone or vortex structure within the aneurysm. “Complex” indicates flow patterns exhibiting flow divisions or separations within the aneurysm sac and containing more than 1 recirculation zone or vortex structure.

**Flow stability.** “Stable” indicates flows patterns that persist (do not move or change) during the cardiac cycle. “Unstable” indicates flow patterns in which the flow divisions and/or vortex structures move or are created or destroyed during the cardiac cycle.

**Inflow concentration.** “Concentrated” inflow streams or jets penetrate relatively deep into the aneurysm sac and are thin or narrow in the main flow direction. “Diffuse” indicates inflow streams that are thick compared with the aneurysm neck and flow jets that disperse.

**Flow impingement.** The “flow impingement zone” is the region of the aneurysm where the inflow stream is seen to impact the aneurysm wall and change its direction and/or disperse. Typically this region has an associated region of elevated WSS: a small impingement if the area of the impingement region is small compared with the area of the aneurysm (<50%); a large impingement, if the area of impingement is large compared with the area of the aneurysm (>50%).

For the evaluation of qualitative hemodynamic parameters, an inter-reader agreement analysis was performed. 200 aneurysms in the training cohort were randomly selected and evaluated independently by two observers (G.Z.C. and Z.S., with 7 and 3 years experiences in neuroradiology, respectively), who were blinded to the clinical history of the patients. In cases of disagreement between the two observers, consensus was reached after a joint reading. After validating good inter-reader agreement, the qualitative hemodynamic assessment of all aneurysms was performed by an observer (G.Z.C. with 7 years experiences in neuroradiology).

**Supplementary Figure 2** shows some representative qualitative hemodynamic images for

unruptured and ruptured intracranial aneurysms.

## **Supplemental Appendix 2.** Introduction of the Employed Machine Learning Algorithms.

Four ML methods (LR, SVM, RF, and MLP) for developing a prediction model were implemented for predicting small intracranial aneurysms rupture status, and they represent different categories of ML algorithm. The details of the methods are as follows:

**Logistic Regression (LR):** LR model is a regression model. For each data sample, the LR model will output the probability of being positive. In the training stage, the goal of the model is to estimate a weight for each data dimension to minimize the differences between prediction and label. This weight matrix can tell us how each data dimension will influence the final prediction and this is why LR model has good interpretability.

**Support Vector Machine (SVM):** SVM is a binary classification model. For each data sample, the SVM model will output distance between current data sample, the sign symbol of this distance indicate prediction is positive or negative. The goal of this model in training stage is to find a linear hyperplane separating positive data samples from negative data samples in training set with maximum margin. Besides, we applied kernel function to SVM model to map data into higher dimension to make more accurate hyperplane.

**Random Forest (RF):** The RF model is an ensemble algorithm. RF model consist of a collection of regression or classification decision trees. In training stage, this model is to fit these trees to data. And in prediction stage, the model will output the average prediction of trees in the forest. More details about random forest model can be found in original article.<sup>4</sup>

**Multi-layer perceptron (MLP):** MLP model is a regression model. The implanted MLP is a three-layer network, consists of an input layer, a 64-unit hidden layer and an output layer. Activation function of this network is Rectified Linear Unit (RELU), and the optimizer is Adam. The introduction of this hidden layer will make the MLP model better use data and achieve better performance.

### **Supplemental Appendix 3. Introduction of the Employed Feature Selection Algorithms.**

There were 6 methods used for feature selection in our study, which can be divided into filter (F-test, Pearson correlation coefficient based, mutual information-based feature selection algorithms), wrapper (Recursive Feature Elimination (RFE) algorithm) and embedded categories (L1 based and tree-based feature selection algorithms). Each method was employed individually, and the method with the highest AUC in the validation set was selected.

The filter feature selection methods apply a statistical measure to calculate scores of features, and rank scores to decide whether this feature should be removed or not. In this study, F-test, Pearson correlation coefficient and mutual information-based feature selection algorithms were conducted. Each of the three filter feature selection methods was set to preserve 1%, 5%, 10%, 30% and 50% of the features, so a total of 15 filtering feature selection methods were tested.

For wrapper methods, different feature combinations of features were prepared and selected by the final performance of a base model. RFE algorithm was employed and a 5-fold cross validated Logistic Regression (LR) model was used as base model. Considering matching the number of features, the step size of RFE was set to 10 and the half of the features were selected.

Embedded method prefers to choose the features that best contribute to the accuracy of the base model. In our study, L1 based and tree-based feature selection algorithms were tried. The L1 based method used linear C-support vector classification model as base model, and 4 penalization intensity was tested ( $C=0.01, 0.1, 1$  and  $10$ ). The tree-based feature selection algorithm employed extra-trees classifier as base model (num of estimators = 100, criterion = gini, min samples for split = 2, min samples per leaf = 1, min impurity decrease = 0.0). Above all, 5 embedded methods were tested in our study.

## **Supplemental Appendix 4. The Feature Selection Results**

The features used for models fitting are described below:

### **Logistic Regression (LR):**

Clinical: age; sex of male; with smoke; with diabetes mellitus; with ischemic stroke; with coronary artery disease;

Morphological: size; with regular shape; with unregular shape; locate at PCoA; locate at ACoA; locate at ICA; locate at MCA;

Hemodynamic: with stable inflow; with concentrated inflow concentration; with small impingement area; with hypertension; WSS; RRT; OSI; GON; AWSSG.

### **Support Vector Machine (SVM):**

Clinical: age; sex of male; with smoke; with alcohol intaking; with diabetes mellitus; with coronary artery disease; with ischemic stroke;

Morphological: size; with unregular shape; locate at PCoA; locate at ACoA; locate at ICA; locate at MCA; without daughter sac; with single aneurysm; with simple flow pattern in the aneurysm sac;

Hemodynamic: with stable inflow; with concentrated inflow concentration; with small impingement area; with hypertension; pressure; OSI; RRT; WSS; AWSSG; AWSSMEAN; GON; WSSG; AFI; AWSSABS; G.

### **Random Forest (RF):**

Clinical: age; sex of male; with smoke; with diabetes mellitus; with coronary artery disease; with ischemic stroke;

Morphological: Size; with unregular shape; locate at PCoA; locate at ACoA; locate at ICA; locate at MCA;

Hemodynamic: with stable inflow; with concentrated inflow concentration; with small impingement area; WSS; GON; OSI; RRT; AWSSG; with hypertension.

### **Multi-layer Perceptron (MLP):**

All collected features were involved for model fitting.



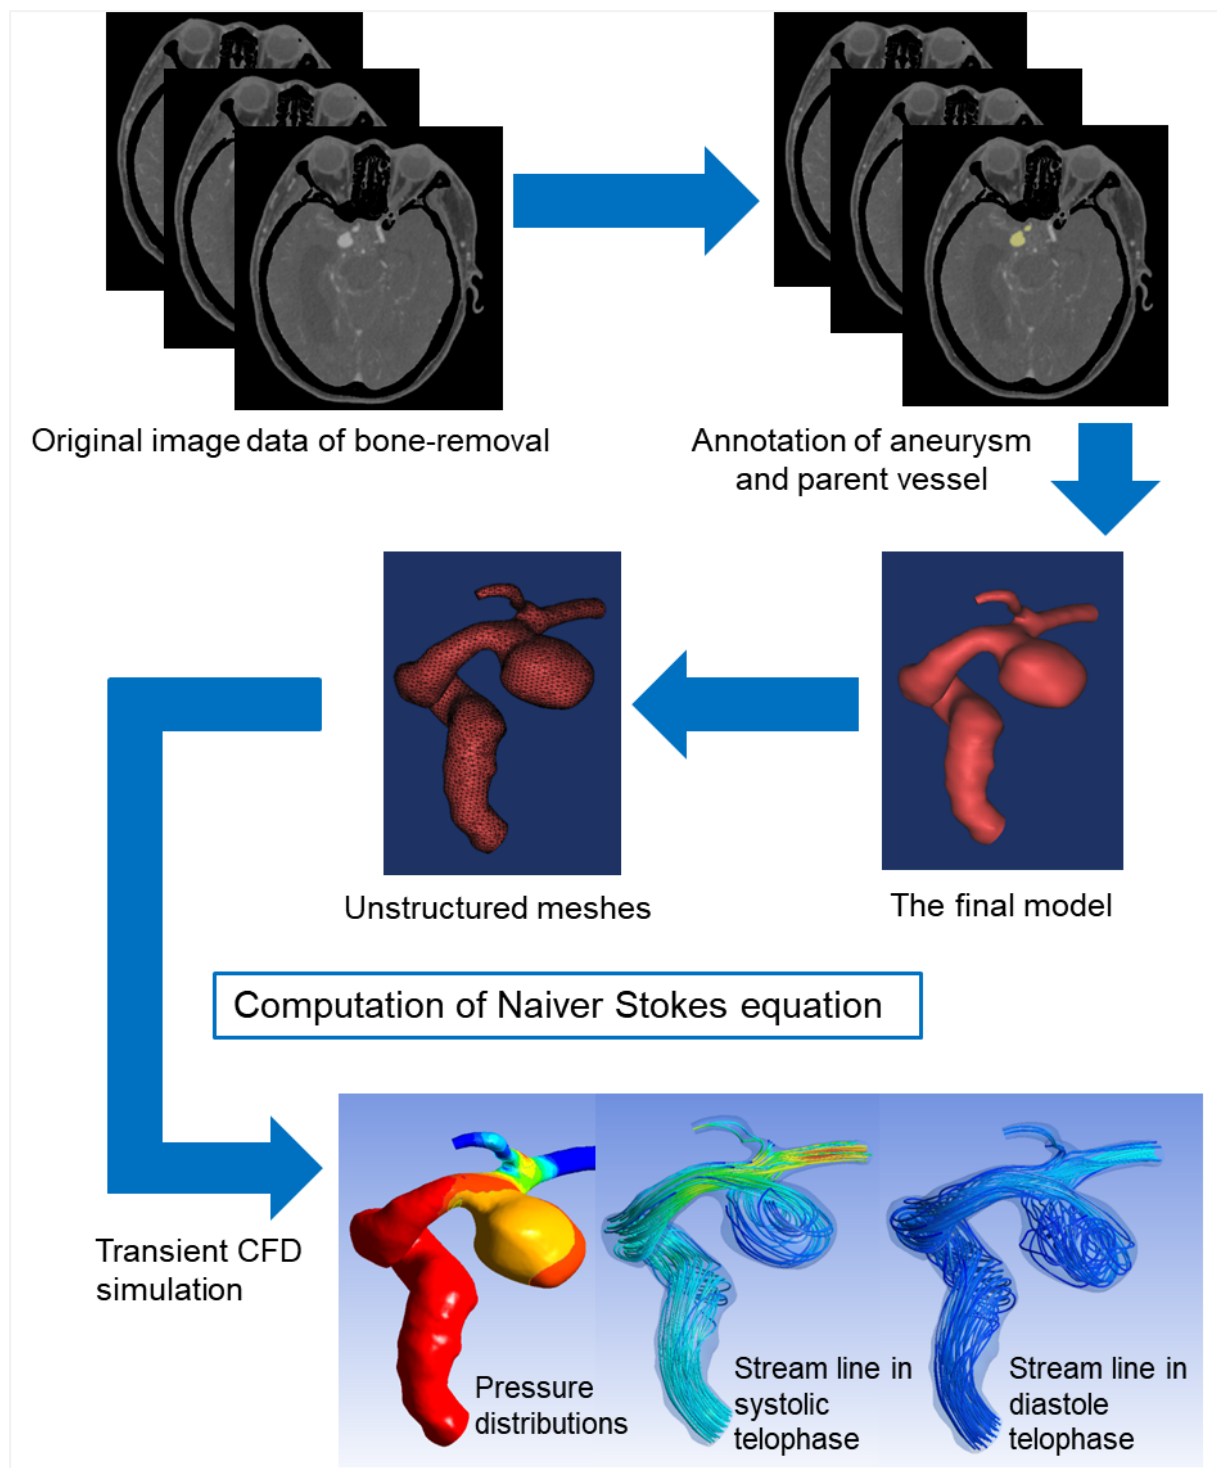

**Supplemental Figure 1.** Computational Fluid Dynamics (CFDs) Simulation Procedure. The graph indicates the major procedures of CFD, including human annotation, model reconstruction, unstructured meshes, and transient CFD simulation.

Note: The process of the CFD was conducted with commercial software in our study. 2D cross-sectional images of CTA images of the cerebral aneurysms and its parent arteries were first imported into MIMICS, Version 16.0 for image segmentation and reconstruction. The vascular models were converted to a stereolithography (STL) format and exported to

Workbench, Version 15.0 (ANSYS Inc.). Unstructured meshes were created with ICEM CFD, Version 15.0 (ANSYS Inc.). The maximum element size was 0.5 mm with a minimum size of 0.2 mm for the high curvature regions and the surface of the aneurysms. Unsteady CFD simulation was performed with Fluent, Version 15.0 (ANSYS Inc.), which uses a finite volume approach to solve the Navier-Stokes equations (Figure R2, and also seen in Supplemental Figure 1 in the Supplementary file).

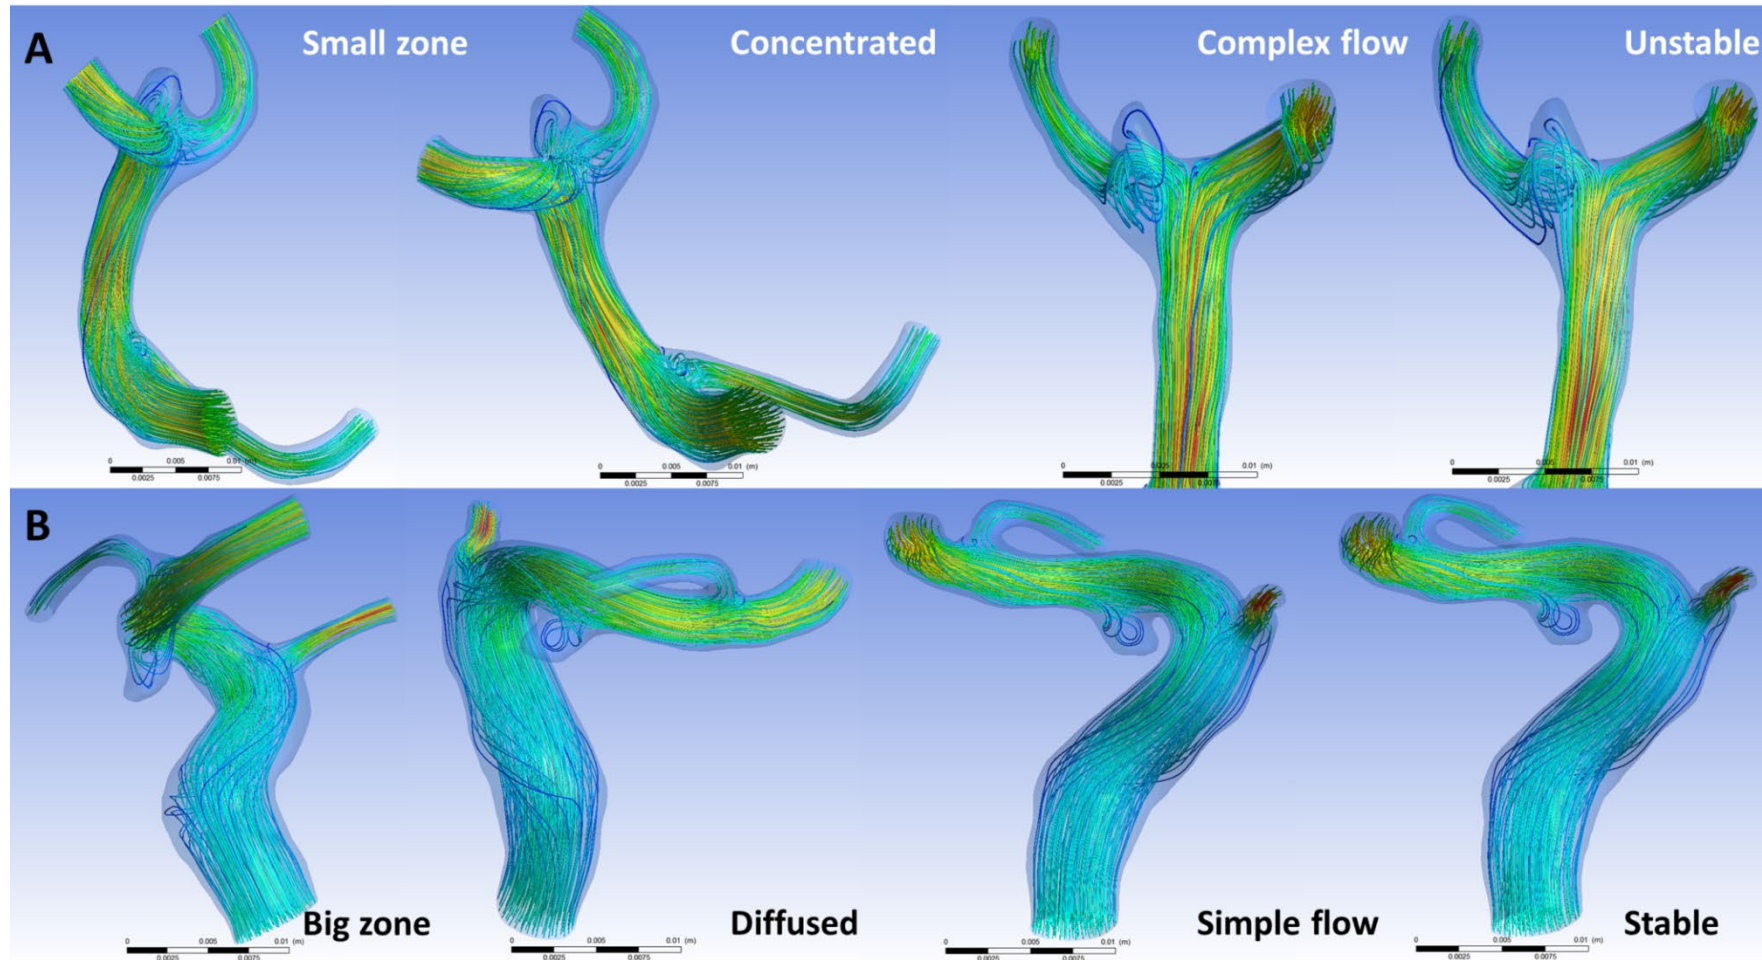

**Supplemental Figure 2.** Representative Qualitative Hemodynamic Parameters for Unruptured and Ruptured sIAs.

Visualizations of ruptured aneurysm of AcoA (A. top row) and unruptured aneurysm of PcoA (B. bottom row) at peak systole for the first three and at end diastole for the fourth one by using streamlines. From left to right, the visualizations show impingement zone concentration, complexity, and stability.

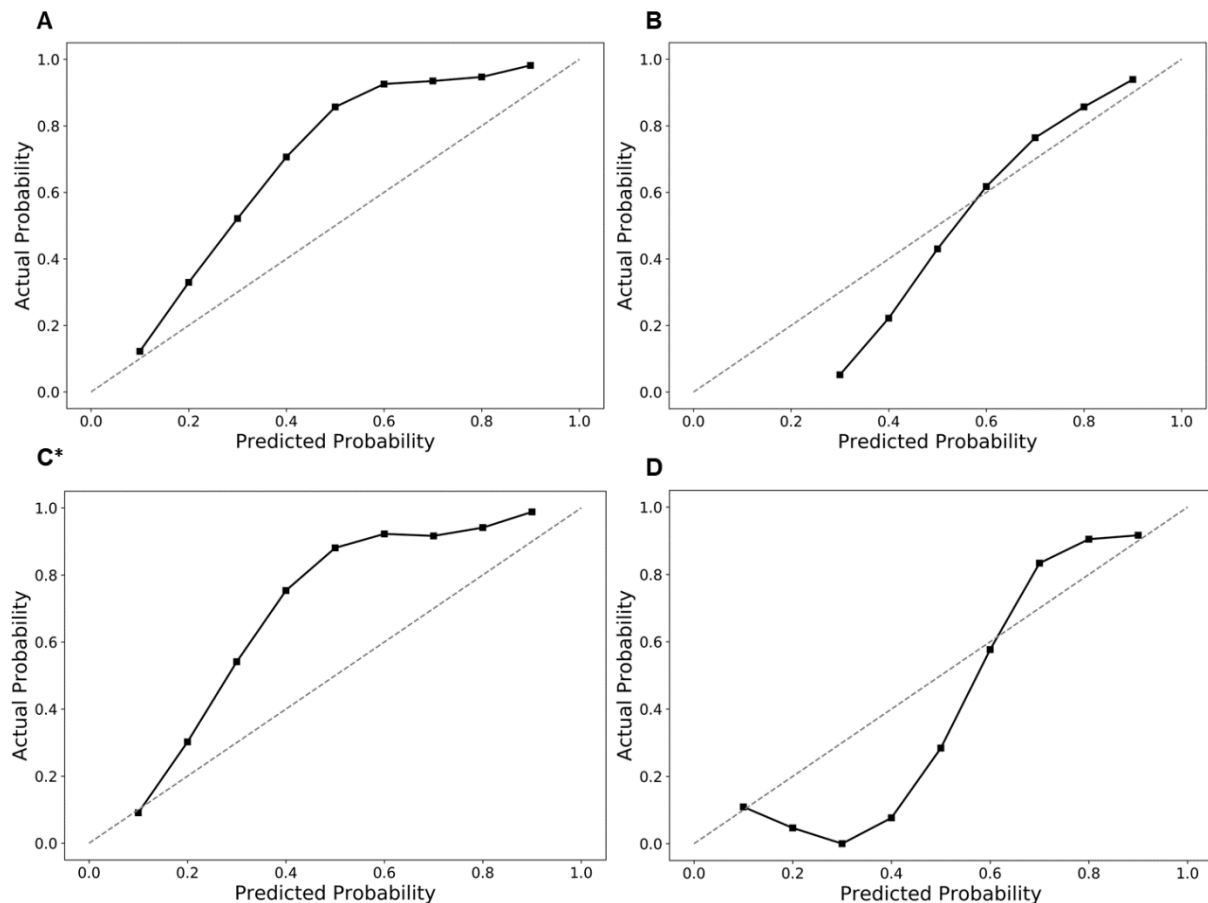

**Supplemental Figure 3.** Calibration Curves in the Internal Dataset.

Panels A-D: Calibration curves in the internal validation dataset for LR, RF, SVM, and MLP, respectively.

LR, logistic regression model; SVM, support vector machine model; RF, random forest model.

\*:The output of each data sample of SVM Model is distance between the hyperplane and data sample, so we first apply sigmoid function on it to transform this distance to a value in range from zero to one to represent the probability.

Note: A (LR) and C (SVM) tend to underestimate the probability of rupture. B (RF), for the interval with low prediction probability, tends to overestimate the probability of rupture; for the interval with high prediction probability, the prediction probability is more accurate. For D (MLP), for the interval with low prediction probability, it tends to overestimate the probability of rupture; for intervals with high prediction probability, the probability of rupture tends to be underestimated.

Several reasons contributed to the low predicted probability of being ruptured. Firstly, we only have 94 cases in the internal validation cohort, which is too small to construct the calibration curve. Secondly, the probability values generated by SVM or other machine learning models

were not calibrated itself. For example, the SVM often shows a sigmoid curve, which is typical for maximum-margin methods.<sup>1</sup>

#### Reference

1. Niculescumizil A, Caruana R. Predicting good probabilities with supervised learning. International Conference on Machine Learning, 2005: 625-632.

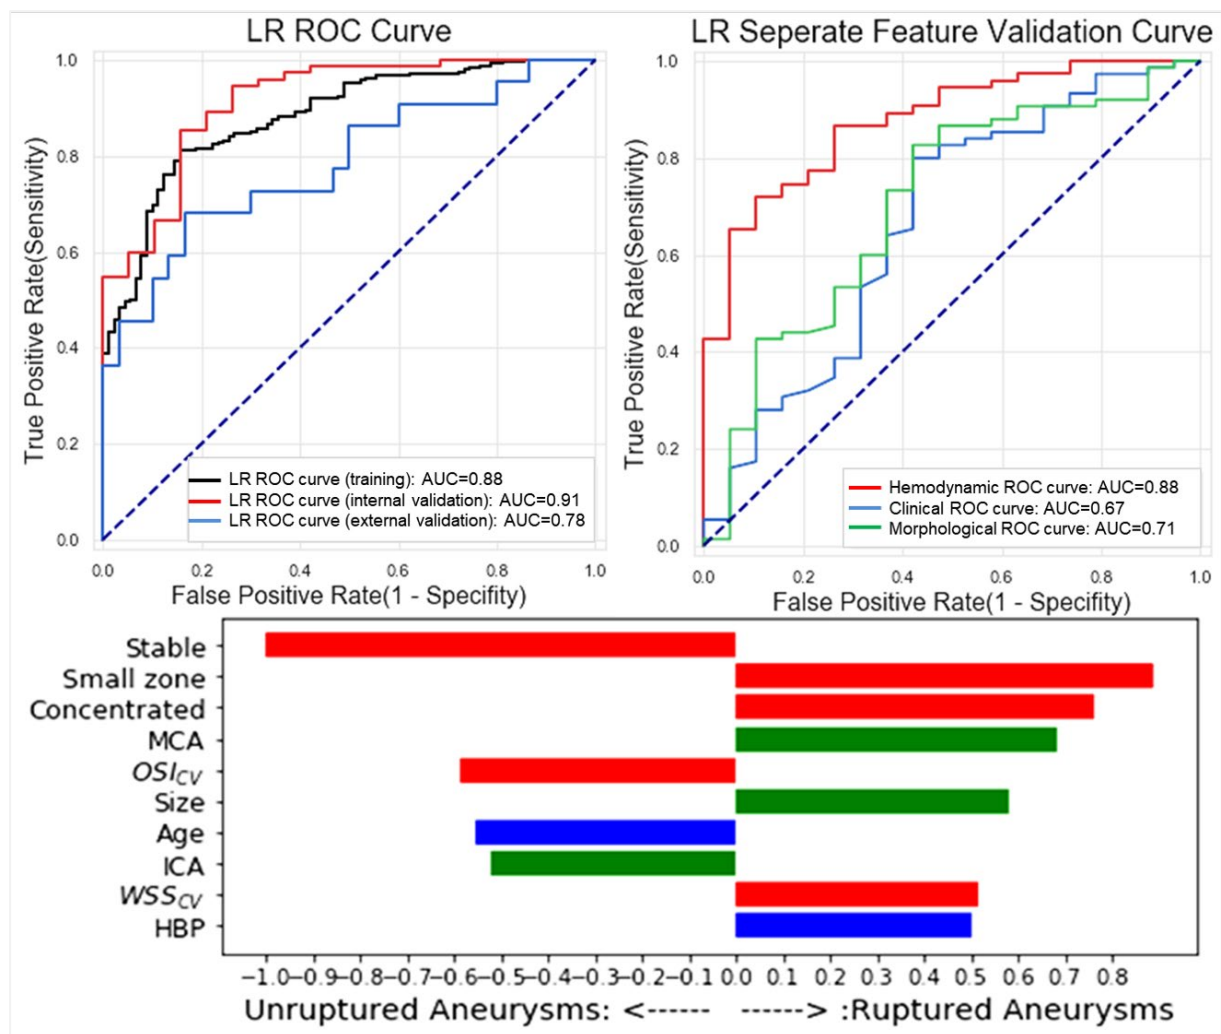

**Supplemental Figure 4.** Performance of LR algorithm, the derived top 10 variables and the performance of the features belonging to the three categories separately in the internal validation dataset.

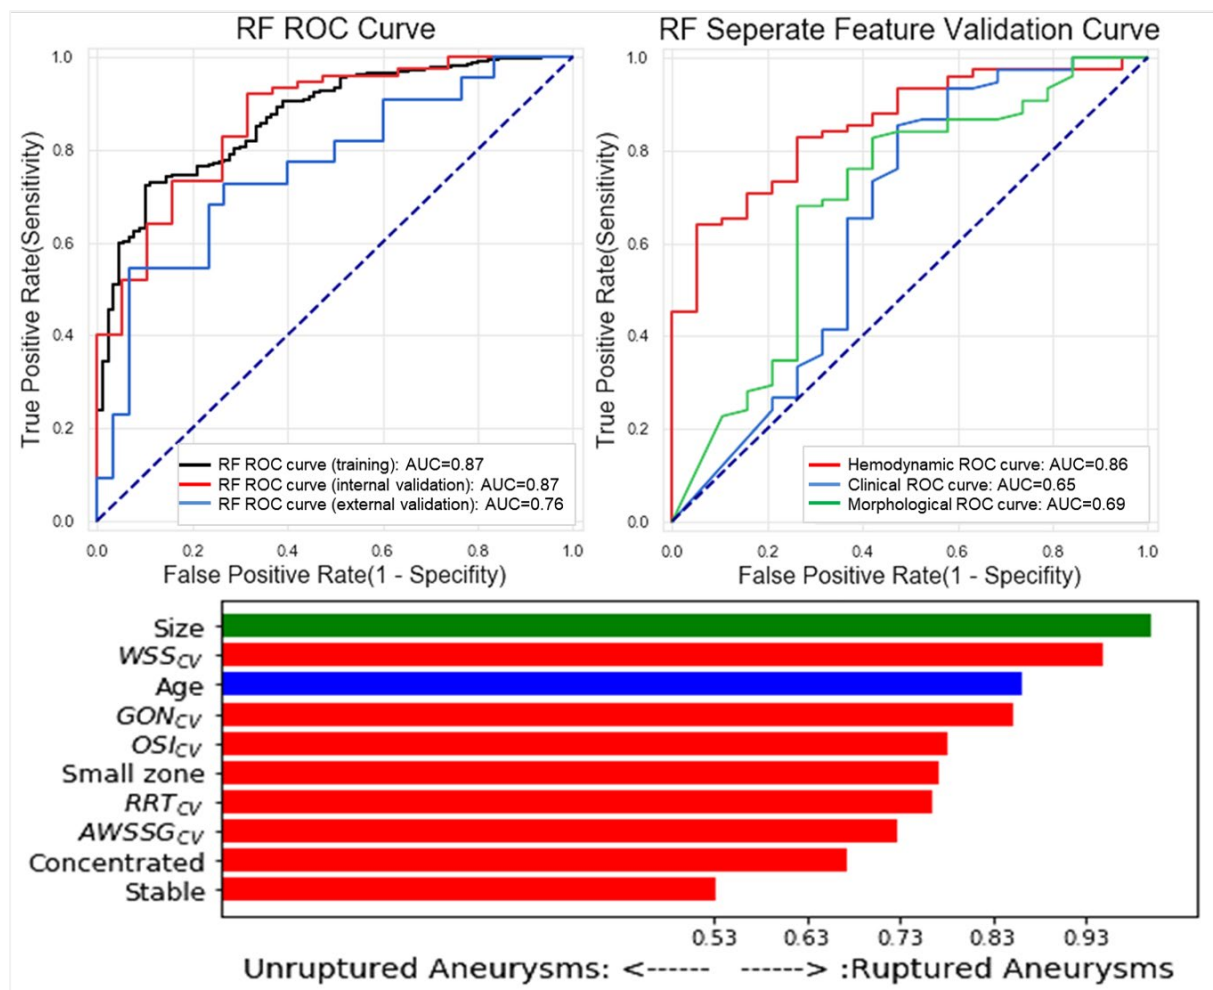

**Supplemental Figure 5.** Performance of RF algorithm, the derived top 10 variables and the performance of the features belonging to the three categories separately in the internal validation dataset.

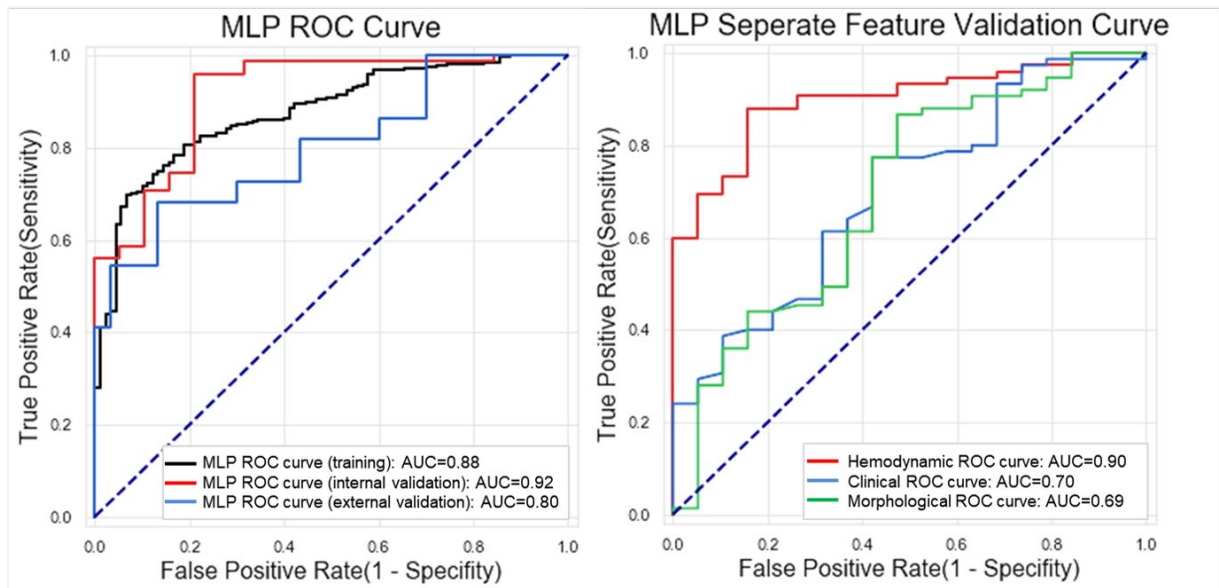

**Supplemental Figure 6.** Performance of MLP algorithm and the performance of the features belonging to the three categories separately in the internal validation dataset. Note: Feature ranks are not available by MLP.



**Supplemental Table 1.** CTA Protocols of the Three Medical Centers.

| Parameters              | Jinling Hospital                                                                       | Tianjin First Center Hospital                                            | Taizhou Hospital                                                         |
|-------------------------|----------------------------------------------------------------------------------------|--------------------------------------------------------------------------|--------------------------------------------------------------------------|
| CT scanners             | Somatom Definition Flash or Somatom Definition, Siemens Healthcare, Forchheim, Germany | Revolution CT, GE Healthcare, USA                                        | Somatom Definition Flash, Siemens Healthcare, Forchheim, Germany         |
| tube voltage            | 120 kVp                                                                                | 100 kVp                                                                  | 100 kVp                                                                  |
| tube current            | 140–180 mAs                                                                            | SmartmA300-500 NI 5                                                      | 104 mA                                                                   |
| rotation time           | 0.5 s                                                                                  | 0.5 s                                                                    | 0.28 s                                                                   |
| CT detector collimation | 64 × 0.6 mm or 64 × 2 × 0.6 mm                                                         | 128 × 0.625mm                                                            | 128 × 0.6                                                                |
| CM type                 | Iopromide, Ultravist 300 mg I/mL, Bayer Schering Pharma, Berlin, Germany               | Iopromide, Ultravist 370 mg I/mL, Bayer Schering Pharma, Berlin, Germany | Iopromide, Ultravist 370 mg I/mL, Bayer Schering Pharma, Berlin, Germany |
| CM concentration        | 300 mg I/ml                                                                            | 370 mg I/ml                                                              | 370 mg I/ml                                                              |
| CM dosage               | 60 ml                                                                                  | 50 ml                                                                    | 65 ml                                                                    |
| CM injection rate       | 4.0 ml/s                                                                               | 4.5 ml/s                                                                 | 4.5 ml/s                                                                 |
| Image matrix            | 512×512                                                                                | 512 × 512                                                                | 512 × 512                                                                |

---

|                          |         |          |         |
|--------------------------|---------|----------|---------|
| Field of view            | 250 mm  | 250 mm   | 250 mm  |
| Reconstruction thickness | 0.75 mm | 0.625 mm | 0.75 mm |

---

**Supplemental Table 2.** Characteristics of Clinical, Morphological and Hemodynamics in Unruptured and Ruptured Small Aneurysms in the Internal Dataset.

| Variables                        | Unruptured group<br>(n=109) | Ruptured group<br>(n=395) | <i>p</i> -value |
|----------------------------------|-----------------------------|---------------------------|-----------------|
| <b>Patient Characteristics</b>   |                             |                           |                 |
| Age, years                       | 58.3±11.1                   | 54.5±11.8                 | .003            |
| Male, n (%)                      | 54(49.5%)                   | 150(38.0%)                | .030            |
| Single aneurysms, n (%)          | 94(86.2%)                   | 350(88.6%)                | .499            |
| SAH family history, n (%)        | 0(0.00%)                    | 5(1.3%)                   | .238            |
| Alcohol intake, n (%)            | 11(10.1%)                   | 35(8.9%)                  | .693            |
| Smoking, n (%)                   | 15(13.8%)                   | 41(10.4%)                 | .320            |
| Hypertension, n (%)              | 35(32.1%)                   | 171(43.3%)                | .036            |
| Diabetes Mellitus, n (%)         | 9(8.3%)                     | 15(3.8%)                  | .053            |
| Ischemic stroke, n (%)           | 9(8.3%)                     | 6(1.5%)                   | <.001           |
| Coronary artery disease, n (%)   | 7(6.4%)                     | 5 (1.3%)                  | .002            |
| <b>Aneurysms Characteristics</b> |                             |                           |                 |
| Daughter sac, n (%)              | 0(0%)                       | 10(2.5%)                  | .094            |
| Size (mm)                        | 3.68±0.80                   | 3.75 (3.00, 4.35)         | .068            |
| Regular shape, n (%)             | 91(83.5%)                   | 321(81.3%)                | <.001           |
| Location                         |                             |                           | <.001           |
| PCoA, n (%)                      | 31(28.4%)                   | 95(24.1%)                 | .349            |

|                                             |                         |                         |       |
|---------------------------------------------|-------------------------|-------------------------|-------|
| ACoA, n (%)                                 | 18(16.5%)               | 160(40.5%)              | <.001 |
| ICA, n (%)                                  | 34(31.2%)               | 31(7.8%)                | <.001 |
| MCA, n (%)                                  | 11(10.1%)               | 81(20.5%)               | .013  |
| Others, n (%)                               | 15(13.8%)               | 28(7.1%)                | .027  |
| <b>Qualitative Hemodynamic Parameters</b>   |                         |                         |       |
| Simple flow, n (%)                          | 73(67.0%)               | 186(47.1%)              | <.001 |
| Concentrated inflow, n (%)                  | 20(18.3%)               | 243(61.5%)              | <.001 |
| Small flow impingement, n (%)               | 31(28.4%)               | 290(73.4%)              | <.001 |
| Stable flow, n (%)                          | 77(70.6%)               | 170(43.0%)              | <.001 |
| <b>Quantitative Hemodynamic Parameters</b>  |                         |                         |       |
| Pressure <sub>cv</sub> ( $\times 10^{-2}$ ) | 0.78 (0.42-1.52)        | 0.58 (0.21, 1.16)       | .018  |
| AWSSMEAN <sub>cv</sub>                      | 0.7580 (0.5867, 0.9427) | 0.8250 (0.6527, 1.0354) | .006  |
| WSS <sub>cv</sub>                           | 0.7996 (0.6044, 1.0698) | 0.8766 (0.6866, 1.1698) | .005  |
| AWSSABS <sub>cv</sub>                       | 0.7316 (0.5728, 0.9290) | 0.7980 (0.6313, 1.0101) | .002  |
| OSI <sub>cv</sub>                           | 2.1378 $\pm$ 0.6034     | 1.8842 $\pm$ 0.5803     | <.001 |
| RRT <sub>cv</sub>                           | 1.1130 (0.8321, 1.3070) | 1.1011 (0.8478, 1.3492) | .642  |
| WSSG <sub>cv</sub>                          | 1.3028 (1.0968, 1.5403) | 1.3980 (1.1405, 1.7250) | .027  |
| AWSSG <sub>cv</sub>                         | 1.2802 (1.0700, 1.4338) | 1.2937 (1.0960, 1.5380) | .138  |
| AFI <sub>cv</sub> ( $\times 10^{-1}$ )      | 0.670 (0.366, 1.213)    | 0.873 (0.409, 1.730)    | .035  |
| G <sub>cv</sub>                             | 1.3252 (1.1342, 1.4864) | 1.3479 (1.1546, 1.6132) | .088  |
| GON <sub>cv</sub>                           | 1.2345 (1.1625, 1.2865) | 1.2008 (1.1192, 1.2760) | .013  |

---

SAH, subarachnoid hemorrhage; ACoA, anterior communicating artery; ICA, internal carotid artery; PCoA, posterior communicating artery; ACA, anterior cerebral artery; CV, coefficient of variable; WSS, wall shear stress; AWSSMEAN, average of the mean WSS; AWSSABS, averaged WSS-absolute; OSI, oscillatory shear index; RRT, relative residence time; WSSG, WSS gradient; AWSSG, averaged WSS gradient; AFI, aneurysm formation index; G, spatial WSS gradient; GON, Gradient

oscillatory number.

**Supplemental Table 3.** Characteristics of Patients, Aneurysms and Hemodynamics in the Training, Internal Validation and External Validation Dataset.

| Characteristics                | Training set<br>(n=410) | Internal validation set<br>(n=94) | $p^{\dagger}$ -value | External validation set<br>(n=52) | $p^{\dagger}$ -value |
|--------------------------------|-------------------------|-----------------------------------|----------------------|-----------------------------------|----------------------|
| <b>Patient Characteristics</b> |                         |                                   |                      |                                   |                      |
| Ruptured aneurysms, n (%)      | 320 (81.0%)             | 75 (79.8%)                        | .712                 | 22 (42.3%)                        | <.001                |
| Age, years                     | 55.6±12.1               | 54.2±10.1                         | .302                 | 53.3±11.9                         | .208                 |
| Male, n (%)                    | 166 (40.5%)             | 38 (40.4%)                        | .991                 | 20 (35.5%)                        | .779                 |
| Single aneurysm, n (%)         | 360 (87.8%)             | 84 (89.4%)                        | .675                 | 43 (82.7%)                        | .299                 |
| SAH family history, n (%)      | 5 (1.2%)                | 0(0%)                             | .282                 | 0 (0%)                            | .424                 |
| Alcohol intake, n (%)          | 37 (9.0%)               | 9 (9.6%)                          | .867                 | 5 (9.6%)                          | .889                 |
| Smoking, n (%)                 | 43 (10.5%)              | 13 (13.8%)                        | .353                 | 7 (13.5%)                         | .516                 |
| Hypertension, n (%)            | 165 (40.2%)             | 41 (43.6%)                        | .549                 | 16 (30.8%)                        | .188                 |
| Diabetes Mellitus, n (%)       | 20 (4.9%)               | 4 (4.3%)                          | .798                 | 1 (1.9%)                          | .366                 |
| Ischemic stroke, n (%)         | 13 (3.2%)               | 2 (2.1%)                          | .592                 | 1 (1.9%)                          | .621                 |
| Coronary artery disease, n (%) | 10 (2.4%)               | 2 (2.1%)                          | .858                 | 5 (9.6%)                          | .006                 |

| Aneurysms Characteristics          |                   |                   |      |            |       |
|------------------------------------|-------------------|-------------------|------|------------|-------|
| No daughter sac, n (%)             | 401 (97.8%)       | 93 (98.9%)        | .479 | 44 (84.6%) | <.001 |
| Size (mm), n (%)                   | 3.83 (3.25, 4.48) | 3.89 (3.12, 4.24) | .519 | 3.89±0.74  | .540  |
| Regular shape, n (%)               | 265 (64.6%)       | 56 (59.6%)        | .358 | 32 (61.5%) |       |
| Location                           |                   |                   | .682 |            | .022  |
| PCoA, n (%)                        | 102 (24.9%)       | 24 (25.5%)        | .895 | 5 (9.6%)   | .014  |
| ACoA, n (%)                        | 142 (34.6%)       | 36 (38.3%)        | .503 | 14 (26.9%) | .269  |
| ICA, n (%)                         | 55 (13.4%)        | 10 (10.6%)        | .469 | 19 (36.5)  | <.001 |
| MCA, n (%)                         | 77 (18.8%)        | 15 (16.0%)        | .523 | 12 (23.1%) | .460  |
| Others, n (%)                      | 34 (8.3%)         | 9 (9.6%)          | .688 | 2 (3.8%)   | .260  |
| Qualitative Hemodynamic Parameters |                   |                   |      |            |       |
| Simple flow, n (%)                 | 208 (50.7%)       | 51 (54.3%)        | .538 | 17 (32.7%) | .014  |
| Concentrated inflow, n (%)         | 214 (52.2%)       | 49 (52.1%)        | .991 | 8 (15.4%)  | <.001 |
| Small flow impingement, n (%)      | 258 (62.9%)       | 63 (67.0%)        | .457 | 21 (40.4%) | .002  |
| Stable flow, n (%)                 | 201 (49.0%)       | 46 (48.9%)        | .988 | 9 (17.3%)  | <.001 |

| Quantitative Hemodynamic Parameters         |                         |                         |      |                         |       |
|---------------------------------------------|-------------------------|-------------------------|------|-------------------------|-------|
| Pressure <sub>CV</sub> ( $\times 10^{-2}$ ) | 0.62 (0.22, 1.21)       | 0.70 (0.26, 1.27)       | .652 | 0.86 (0.56, 1.40)       | .007  |
| AWSSMEAN <sub>CV</sub>                      | 0.8148 (0.6387, 1.0285) | 0.7952 (0.5947, 0.9637) | .168 | 0.8737 $\pm$ 0.3438     | .917  |
| WSS <sub>CV</sub>                           | 0.8711 (0.6647, 1.1357) | 0.8368 (0.6308, 1.1331) | .216 | 0.8606 $\pm$ 0.3079     | .149  |
| AWSSABS <sub>CV</sub>                       | 0.7894 (0.6229, 1.0011) | 0.7608 (0.5730, 0.9464) | .147 | 0.8647 $\pm$ 0.3554     | .867  |
| OSI <sub>CV</sub>                           | 1.9531 $\pm$ 0.5888     | 1.8782 $\pm$ 0.6158     | .271 | 2.3117 $\pm$ 0.6880     | <.001 |
| RRT <sub>CV</sub>                           | 1.0989 (0.8479, 1.3484) | 1.1574 (0.7701, 1.3411) | .602 | 1.3091 $\pm$ 0.4615     | .010  |
| WSSG <sub>CV</sub>                          | 1.3916 (1.1353, 1.6975) | 1.3169 (1.0968, 1.6346) | .287 | 1.3828 $\pm$ 0.3256     | .299  |
| AWSSG <sub>CV</sub>                         | 1.2954 (1.0943, 1.5145) | 1.2726 (1.0471, 1.4860) | .318 | 1.3208 (1.1211, 1.5387) | .431  |
| AFI <sub>CV</sub> ( $\times 10^{-1}$ )      | 0.819 (0.415, 1.643)    | 0.716 (0.339, 1.599)    | .594 | 0.672 (0.328, 1.157)    | .107  |
| G <sub>CV</sub>                             | 1.3479 (1.1540, 1.5771) | 1.3005 (1.0963, 1.5866) | .312 | 1.3753 (1.1530, 1.5670) | .636  |
| GON <sub>CV</sub>                           | 1.2043 (1.1265, 1.2740) | 1.2356 (1.1544, 1.2834) | .135 | 1.2219 (1.1882, 1.2515) | .371  |

SAH, subarachnoid hemorrhage; ACoA, anterior communicating artery; ICA, internal carotid artery; PCoA, posterior communicating artery; ACA, anterior cerebral artery; CV, coefficient of variable; WSS, wall shear stress; AWSSMEAN, average of the mean WSS; AWSSABS, averaged WSS- absolute; OSI, oscillatory shear index; RRT, relative residence time; WSSG, WSS gradient; AWSSG, averaged WSS gradient; AFI, aneurysm formation index; G, spatial WSS gradient; GON, Gradient oscillatory number.

†:  $p < .05$  means a significant difference exists in the training dataset and the internal validation dataset.

‡:  $p < .05$  means a significant difference exists in the training dataset and the general external validation dataset.



**Supplemental Table 4.** Characteristics of Clinical, Morphological and Hemodynamic in Internal Dataset and the Separating External Validation Dataset.

| Variables                      | Jinling dataset (n,504) | Taizhou validation set<br>(n,22) | P <sup>#</sup> value | Tianjin validation set<br>(n,30) | P <sup>*</sup> value |
|--------------------------------|-------------------------|----------------------------------|----------------------|----------------------------------|----------------------|
| <b>Demographic Information</b> |                         |                                  |                      |                                  |                      |
| Ruptured aneurysms, n (%)      | 395 (78.4%)             | 11(50.0%)                        | .002                 | 11 (36.7%)                       | <.001                |
| Age, years                     | 55.3±11.8               | 49.2±7.8                         | .002                 | 56.4±13.6                        | .635                 |
| Male, n (%)                    | 204(40.5%)              | 5 (22.7%)                        | .096                 | 15 (50.0%)                       | .303                 |
| Single aneurysm, n (%)         | 444(88.1%)              | 16 (72.7%)                       | .033                 | 27 (90.0%)                       | .754                 |
| SAH family history, n (%)      | 5 (1%)                  | 0 (0%)                           | .639                 | 0 (0%)                           | .584                 |
| Alcohol intake, n (%)          | 46 (9.1%)               | 0 (0%)                           | .138                 | 5 (16.7%)                        | .173                 |
| Smoking, n (%)                 | 56 (11.1%)              | 0 (0%)                           | .098                 | 7 (23.3%)                        | .044                 |
| Hypertension, n (%)            | 206 (40.9%)             | 5 (22.7%)                        | .089                 | 11 (36.7)                        | .649                 |
| Diabetes Mellitus, n (%)       | 24 (4.8%)               | 0 (0%)                           | .295                 | 1 (3.3%)                         | .719                 |
| Ischemic stroke, n (%)         | 15 (3.0%)               | 0 (0%)                           | .412                 | 1 (3.3%)                         | .911                 |
| Coronary artery disease, n (%) | 12 (2.4%)               | 0 (0%)                           | .465                 | 5 (16.7%)                        | <.001                |

| Aneurysms Characteristics           |                |           |       |           |             |
|-------------------------------------|----------------|-----------|-------|-----------|-------------|
| Size, mm                            | 3.9 [3.2, 4.4] | 3.7±0.8   | .577  | 4.0±0.7   | .164        |
| Regular shape, n (%)                | 230(58.2 %)    | 11(50.0%) | .193  | 21(70.0%) | .485        |
| Daughter sac, n (%)                 | 10(2.0%)       | 7(31.8%)  | <.001 | 1(3.3%)   | .614        |
| Location                            |                |           | .143  |           | .047        |
| ACoA, n (%)                         | 178(35.3%)     | 3(13.6%)  | .036  | 11(36.7%) | .881        |
| ICA, n (%)                          | 65(12.9%)      | 12(54.5%) | <.001 | 7(23.3%)  | .104        |
| PCoA, n (%)                         | 126(25.0%)     | 3(13.6%)  | .226  | 2(6.7%)   | <b>.022</b> |
| MCA, n (%)                          | 92(18.3%)      | 4(18.2%)  | .993  | 8(26.7%)  | .252        |
| Others, n (%)                       | 43(8.5%)       | 0(0%)     | .153  | 2(6.7%)   | .721        |
| Qualitative Hemodynamic Parameters  |                |           |       |           |             |
| Simple flow, n (%)                  | 259(51.4%)     | 10(45.5%) | .586  | 7(23.3%)  | .003        |
| Concentrated inflow, n (%)          | 263(52.2%)     | 6(27.3%)  | .022  | 2(6.7%)   | <.001       |
| Small flow impingement, n (%)       | 321(63.7%)     | 12(54.5%) | .384  | 9(30.0%)  | <.001       |
| Stable flow, n (%)                  | 247(49.0%)     | 5(22.7%)  | .016  | 4(13.3%)  | <.001       |
| Quantitative Hemodynamic Parameters |                |           |       |           |             |
|                                     |                |           |       |           |             |

|                                             |                         |                     |      |                         |      |
|---------------------------------------------|-------------------------|---------------------|------|-------------------------|------|
| Pressure <sub>cv</sub> ( $\times 10^{-2}$ ) | 0.63 [0.24-1.212]       | 0.97 $\pm$ 0.61     | .120 | 0.87 [0.63, 2.12]       | .025 |
| AWSSMEAN <sub>cv</sub>                      | 0.8122 [0.6332, 1.0150] | 0.8316 $\pm$ 0.3015 | .716 | 0.9045 $\pm$ 0.3737     | .659 |
| WSS <sub>cv</sub>                           | 0.8604 [0.6590, 1.1355] | 0.8371 $\pm$ 0.2930 | .270 | 0.8166 [0.6720, 1.0347] | .449 |
| AWSSABS <sub>cv</sub>                       | 0.7828 [0.6147, 0.9851] | 0.8205 $\pm$ 0.2967 | .874 | 0.8972 $\pm$ 0.3948     | .513 |
| OSI <sub>cv</sub>                           | 1.94 $\pm$ 0.59         | 2.4573 $\pm$ 0.8170 | .008 | 2.2049 $\pm$ 0.5667     | .017 |
| RRT <sub>cv</sub>                           | 1.1012 [0.8386, 1.3465] | 1.2184 $\pm$ 0.4616 | .421 | 1.3756 $\pm$ 0.4576     | .004 |
| WSSG <sub>cv</sub>                          | 1.3760 [1.1319, 1.6812] | 1.3273 $\pm$ 0.2953 | .208 | 1.4235 $\pm$ 0.3453     | .922 |
| AWSSG <sub>cv</sub>                         | 1.2900 [1.0918, 1.5128] | 1.3224 $\pm$ 0.3047 | .840 | 1.3584 [1.1586, 1.5439] | .153 |
| AFI <sub>cv</sub> ( $\times 10^{-1}$ )      | 0.779 [0.402, 1.630]    | 0.784 $\pm$ 0.605   | .158 | 0.678 [0.371, 1.222]    | .398 |
| G <sub>cv</sub>                             | 1.3410 [1.1430, 1.5780] | 1.3601 $\pm$ 0.3042 | .636 | 1.4090 [1.1846, 1.5689] | .215 |
| GON <sub>cv</sub>                           | 1.2080 [1.1300, 1.2787] | 1.2267 $\pm$ 0.0781 | .219 | 1.2043 [1.1742, 1.2457] | .821 |

SAH, subarachnoid hemorrhage; ACoA, anterior communicating artery; ICA, internal carotid artery; PCoA, posterior communicating artery; ACA, anterior cerebral artery; CV, coefficient of variable; WSS, wall shear stress; AWSSMEAN, average of the mean WSS; AWSSABS, averaged WSS- absolute; OSI, oscillatory shear index; RRT, relative residence time; WSSG, WSS gradient; AWSSG, averaged WSS gradient; AFI, aneurysm formation index; G, spatial WSS gradient; GON, Gradient oscillatory number.

<sup>#</sup>: p <0.05 means a significant difference exists in the Jinling Hospital and Taizhou validation cohorts.

<sup>\*</sup>: p <0.05 means a significant difference exists in the Jinling Hospital and Tianjin validation cohorts.

**Supplemental Table 5.** Performance of 3 ML Models to Predict Rupture Status of Small Aneurysms in the Training, Internal Validation and External Validation Datasets.

|             | Training set<br>(n=410) | Internal validation set<br>(n=94) | External validation set<br>(n=52) | Tianjin set<br>(n=30) | Taizhou set<br>(n=22) |
|-------------|-------------------------|-----------------------------------|-----------------------------------|-----------------------|-----------------------|
| <b>LR</b>   |                         |                                   |                                   |                       |                       |
| AUC         | .88                     | .91                               | .78                               | .66                   | .89                   |
| 95% CI      | .85-.92                 | .84-.99                           | .65-.92                           | .47-.82               | .69-.98               |
| Sensitivity | 81.3%                   | 84.0%                             | 72.7%                             | 63.6%                 | 81.8%                 |
| Specificity | 84.4%                   | 84.0%                             | 60.0%                             | 47.4%                 | 81.8%                 |
| Delong test | -                       | -                                 | .09 <sup>\$</sup>                 | -                     | .09 <sup>//</sup>     |
| <b>RF</b>   |                         |                                   |                                   |                       |                       |
| AUC         | .87                     | .86                               | .76                               | .62                   | .90                   |
| 95% CI      | .83-.91                 | .78-.96                           | .63-.90                           | .42-.79               | .70-.99               |
| Sensitivity | 72.2%                   | 73.3%                             | 59.1%                             | 45.5%                 | 72.7%                 |
| Specificity | 90.0%                   | 78.9%                             | 76.7%                             | 63.2%                 | 100.0%                |
| Delong test | -                       | -                                 | .23 <sup>\$</sup>                 | -                     | .03 <sup>//</sup>     |

|             |         |         |                  |         |                   |  |
|-------------|---------|---------|------------------|---------|-------------------|--|
| <b>SVM</b>  |         |         |                  |         |                   |  |
| AUC         | .88     | .91     | .82              | .71     | .90               |  |
| 95% CI      | .85-.92 | .74-.98 | .69-.94          | .52-.86 | .70-.99           |  |
| Sensitivity | 73.4%   | 77.3%   | 68.2%            | 54.5%   | 81.8%             |  |
| Specificity | 91.1%   | 84.2%   | 76.7%            | 73.7%   | 81.8%             |  |
| Delong test | -       | -       | .21 <sup>§</sup> | -       | .15 <sup>''</sup> |  |
| <b>MLP</b>  |         |         |                  |         |                   |  |
| AUC         | .88     | .92     | .80              | .65     | .93               |  |
| 95% CI      | .84-.91 | .84-.96 | .67-.90          | .46-.82 | .73-.99           |  |
| Sensitivity | 69.7%   | 70.7%   | 68.2%            | 45.5%   | 90.9%             |  |
| Specificity | 93.3%   | 89.5%   | 70.0%            | 63.2%   | 82.8%             |  |
| Delong test | -       | -       | .75 <sup>§</sup> | -       | .03 <sup>''</sup> |  |

<sup>§</sup>:  $p < .05$  means a significant difference exists in AUCs of the ML in the internal and external validation dataset.

<sup>''</sup>:  $p < .05$  means a significant difference exists in AUCs of the ML in Taizhou set and Tianjin set

**Supplemental References:**

1. Ren Y, Chen GZ, Liu Z, Cai Y, Lu GM, Li ZY. Reproducibility of image-based computational models of intracranial aneurysm: a comparison between 3D rotational angiography, CT angiography and MR angiography. *Biomed Eng Online* 2016;15:50.
2. Can A, Du R. Association of hemodynamic factors with intracranial aneurysm formation and rupture: Systematic review and meta-analysis. *Neurosurgery* 2016;78:510-520.
3. Cebal JR, Mut F, Weir J, Putman CM. Association of hemodynamic characteristics and cerebral aneurysm rupture. *AJNR Am J Neuroradiol* 2011;32:264-270.
4. Breiman, L. Random forests. *Machine Learning* 2001;45:5-32.
